# Supplementary material
Source: PubMed Central journal article supplement (PMC4457663)
Supplement: NIHMS667053-supplement-1.pdf [file NIHMS667053-supplement-1.pdf]

**Supplementary Table 1**

| <i>Subject</i> | <i>Bone lesions</i> | <i>Calcium (mg/dl)</i> | <i>Creatinine (mg/dl)</i> | <i>Hemoglobin (g/dl)</i> |
|----------------|---------------------|------------------------|---------------------------|--------------------------|
| 3              | No                  | 9.0                    | 0.8                       | 10.5                     |
| 4              | No                  | 9.0                    | 0.7                       | 13.8                     |
| 6              | No                  | 9.6                    | 0.9                       | 11.4                     |
| 7              | Yes                 | 8.9                    | 0.7                       | 12.9                     |
| 8              | Yes                 | 10.1                   | 1.3                       | 12.2                     |
| 10             | Yes                 | 10.0                   | 1.1                       | 9.9                      |
| 11             | No                  | 9.5                    | 0.8                       | 9.0                      |
| 18             | No                  | 8.8                    | 1.3                       | 12.9                     |
| 19             | No                  | 8.6                    | 0.7                       | 10.8                     |
| 20             | Yes                 | 8.9                    | 1.9                       | 9.4                      |
| 21             | Yes                 | 8.7                    | 1.6                       | 12.1                     |
| 25             | No                  | 8.8                    | 1.4                       | 11.1                     |
| 32             | Yes                 | 11.1                   | 0.9                       | 11.1                     |

**Supplementary Table 1: Supplementary subject data**

Additional clinical and laboratory data for all 13 MM subjects included in the study

**Supplementary Table 2**

| <i>Reagent</i>                | <i>Final conc.</i> | <i>Manufacturer</i>      | <i>Medium/Buffer</i> |
|-------------------------------|--------------------|--------------------------|----------------------|
| RPMI1640                      |                    | Gibco Life Technologies  | Cell culture medium  |
| FBS                           | 10%                | Sigma Aldrich            | Cell culture medium  |
| Sodium pyruvate               | 1mM                | Gibco Life Technologies  | Cell culture medium  |
| MEM non-essential amino acids | 1x                 | Gibco Life Technologies  | Cell culture medium  |
| Penicillin                    | 5U/ml              | Gibco Life Technologies  | Cell culture medium  |
| Streptomycin                  | 5ug/ml             | Gibco Life Technologies  | Cell culture medium  |
| L-glutamine                   | 1.46mg/ml          | Gibco Life Technologies  | Cell culture medium  |
| 10x PBS                       | 1x                 | Ambion Life Technologies | CyFACS               |
| BSA                           | 0.5%               | Sigma Aldrich            | CyFACS               |
| Sodium azide                  | 0.02%              | VWR                      | CyFACS               |
| EDTA                          | 2mM                | Rockland                 | CyFACS               |

**Supplementary Table 2: CyFACS buffer and cell culture medium recipes**

All buffers and cell culture medium were filtered through a 0.2 µm filter.

**Supplementary Table 3**

| <i>Antibody</i>    | <i>Staining</i> | <i>Clone</i> | <i>Manufacturer</i> | <i>Label</i> | <i>Final conc. (µg/ml)</i> |
|--------------------|-----------------|--------------|---------------------|--------------|----------------------------|
| IgM                | S               | G20-127      | BD                  | 139 La       | 8                          |
| CD3                | S               | UCHT1        | Invitrogen          | Qdot 605     | 2µl                        |
| CD3                | S               | UCHT1        | BioLegend           | 141 Pr       | 2                          |
| CD33               | S               | P67.6        | Santa Cruz          | 142 Nd       | 2                          |
| CD4                | S               | SK3          | BioLegend           | 143 Nd       | 4                          |
| CD57               | S               | HCD57        | BioLegend           | 145 Nd       | 1                          |
| CD8                | S               | SK1          | BioLegend           | 146 Nd       | 2                          |
| CD45               | S               | HI30         | BioLegend           | 147 Sm       | 1.2                        |
| IgD                | S               | IA6-2        | BD                  | 149 Sm       | 8                          |
| CD16               | S               | B73.1        | affymetrix          | 150 Nd       | 12                         |
| CD19               | S               | HIB19        | BioLegend           | 151 Eu       | 4                          |
| CD11c              | S               | Bly-6        | BD                  | 152 Sm       | 8                          |
| CD24               | S               | ML5          | BioLegend           | 153 Eu       | 8                          |
| CD27               | S               | LG.7F9       | affymetrix          | 154 Sm       | 8                          |
| CD10               | S               | HI10a        | BioLegend           | 155 Gd       | 10                         |
| CD1c               | S               | L161         | BioLegend           | 156 Gd       | 6                          |
| CD14               | S               | M5E2         | BioLegend           | 157 Gd       | 8                          |
| CCR7               | S               | 150503       | R&D                 | 158 Gd       | 8                          |
| CD7                | S               | M-T701       | BD                  | 159 Tb       | 2                          |
| CD28               | S               | CD28.2       | BD                  | 160 Gd       | 12                         |
| CD5                | S               | UCHT2        | BioLegend           | 161 Dy       | 8                          |
| CD38               | S               | HIT2         | BioLegend           | 165 Ho       | 8                          |
| CD45RA             | S               | HI100        | BioLegend           | 166 Er       | 8                          |
| CD123              | S               | 9F5          | BD                  | 167 Er       | 2                          |
| CD66               | S               | B1.1/CD66    | BD                  | 168 Er       | 2                          |
| CD45RO             | S               | UCHL1        | BioLegend           | 169 Tm       | 8                          |
| CD56               | S               | NCAM16.2     | BD                  | 170 Er       | 12                         |
| HLA-DR             | S               | L243         | BioLegend           | 171 Yb       | 4                          |
| TCR $\gamma\delta$ | S               | 5A6.E9       | life                | PE           | 2                          |
| Anti PE            | S               | PE0001       | BioLegend           | 172 Yb       | 6                          |
| CD25               | S               | M-A251       | BD                  | 173 Yb       | 12                         |
| TCR $\alpha\beta$  | S               | IP26         | BioLegend           | 174 Yb       | 12                         |
| CD127              | S               | A019D5       | BioLegend           | 176 Yb       | 12                         |
| IFN- $\gamma$      | I               | ebio4S.B3    | affymetrix          | 148 Nd       | 2                          |
| TNF- $\alpha$      | I               | MAb11        | BioLegend           | 162 Dy       | 8                          |
| IL4                | I               | 8D4-8        | BD                  | 163 Dy       | 8                          |
| IL17A              | I               | BL23         | BioLegend           | 164 Dy       | 8                          |
| IFN- $\alpha$      | I               | LT27:295     | Miltenyi            | 175 Lu       | 8                          |
| CD20               | I               | H1           | BD                  | 144 Nd       | 8                          |

**Supplementary Table 3: Antibodies used for CyTOF staining**

S: surface; I: intracellular; PE: Phycoerythrin

**Supplementary Table 4**

| <i>Reagent</i>                   | <i>Fluorochrome</i> | <i>Clone</i> | <i>Manufacturer</i> | <i>Experiment</i>  |
|----------------------------------|---------------------|--------------|---------------------|--------------------|
| CD24                             | BV421               | ML5          | BioLegend           | Phosphoflow        |
| CD38                             | PE-Cy7              | HB8          | BD                  | Phosphoflow        |
| CD27                             | BV605               | L128         | BD                  | Phosphoflow        |
| CD20                             | PerCP-Cy5.5         | H1           | BD                  | Phosphoflow        |
| p-SYK                            | AF647               | 17A/P-ZAP70  | BD                  | Phosphoflow        |
| p-p38                            | PE                  | 36/p38       | BD                  | Phosphoflow        |
| ERK1/2                           |                     | 197G2        | CST                 | Phosphoflow        |
| Goat anti rabbit                 | AF488               |              | Invitrogen          | Phosphoflow        |
| CD20                             | PerCP-Cy5.5         | 2H7          | BioLegend           | Singe cell sort    |
| CD24                             | APC                 | ML5          | BioLegend           | Singe cell sort    |
| CD38                             | PE                  | HIT2         | BioLegend           | Singe cell sort    |
| IgD                              | BV421               | IA6-2        | BioLegend           | Singe cell sort    |
| IgM                              | BV510               | MHM-88       | BioLegend           | Singe cell sort    |
| CD19                             | BV650               | HIB19        | BioLegend           | Singe cell sort    |
| CD14                             | APC-Cy7             | M5E2         | BioLegend           | Singe cell sort    |
| CD27                             | PE-Cy7              | LG.7F9       | eBiosciences        | Singe cell sort    |
| IgA                              | FITC                | IS11-8E10    | Miltenyi            | Singe cell sort    |
| NHS ester                        | DyLight800          |              | Fisher Scientific   | Singe cell sort    |
| Zombie NIR fixable viability kit | NIR                 |              | BioLegend           | Phenotype analysis |

**Supplementary Table 4: Antibodies/Reagents used for FACS staining**

**Supplementary Table 5**

|    |                                  |    |                             |
|----|----------------------------------|----|-----------------------------|
| 1  | B/unstim                         | 42 | Tab_CD4+CD45RO+CD28-/unstim |
| 2  | B_CD20+CD38+/unstim              | 43 | Tab_CD4+CD28-CD45RO-/unstim |
| 3  | B_CD20+CD27+/unstim              | 44 | Tab_CD4+CD38-HLA-DR+/unstim |
| 4  | B_CD38+IgD+/unstim               | 45 | Tab_CD4+CD38+HLA-DR+/unstim |
| 5  | B_CD38-IgD+/unstim               | 46 | Tab_CD4+CD45RO-CD38+/unstim |
| 6  | B_CD20+IgM+/unstim               | 47 | Tab_CD4+CD45RO+CD38+/unstim |
| 7  | B_memory/unstim                  | 48 | Treg/unstim                 |
| 8  | B_memory_CD20+CD27+/unstim       | 49 | Treg_CD45RO+/unstim         |
| 9  | B_memory_CD20+CD10+/unstim       | 50 | Tab_CD4+CD8+/unstim         |
| 10 | B_memory_CD20+CD5+/unstim        | 51 | Tab_CD8+/unstim             |
| 11 | B_naive/unstim                   | 52 | Tab_CD8+CD38-HLA-DR+/unstim |
| 12 | B_naive_CD20+CD27+/unstim        | 53 | Tab_CD8+CD38+HLA-DR+/unstim |
| 13 | B_naive_CD20+CD10+/unstim        | 54 | Tab_memory_CD8+/unstim      |
| 14 | B_naive_CD20+CD5+/unstim         | 55 | Tab_memory_CD8+CD57+/unstim |
| 15 | B_transitional/unstim            | 56 | Tab_memory_CD8+CCR7+/unstim |
| 16 | B_transitional_CD20+CD27+/unstim | 57 | Tab_memory_CD8+CD28+/unstim |
| 17 | B_transitional_CD20+CD5+/unstim  | 58 | Tab_naive_CD8+/unstim       |
| 18 | B_transitional_CD20+CD10+/unstim | 59 | Tab_naive_CD8+CCR7+/unstim  |
| 19 | plasmablast/unstim               | 60 | Tab_naive_CD8+CD28+/unstim  |
| 20 | NK/unstim                        | 61 | Tab_naive_CD8+CD57+/unstim  |
| 21 | NK_CD56++CD16-/unstim            | 62 | Tab_CD8+CD45RA-CD28+/unstim |
| 22 | NK_CD56+CD16+/unstim             | 63 | Tab_CD8+CD45RA+CD28+/unstim |
| 23 | NK_56+16-/unstim                 | 64 | Tab_CD8+CD45RA+CD28-/unstim |
| 24 | monocytes/unstim                 | 65 | Tab_CD8+CD45RA-CD28-/unstim |
| 25 | monocytes_CD16-CD14+/unstim      | 66 | Tab_CD8+CD45RA-CD38+/unstim |
| 26 | monocytes_CD16+CD14-/unstim      | 67 | Tab_CD8+CD45RA+CD38+/unstim |
| 27 | myeloid_DC/unstim                | 68 | Tgd_percent/unstim          |
| 28 | mDCs/unstim                      | 69 | Tgd_CD27-CD38+/unstim       |
| 29 | pDC/unstim                       | 70 | Tgd_CD27+CD38+/unstim       |
| 30 | Tab_percent/unstim               | 71 | Tgd_CD27+CD38-/unstim       |
| 31 | Tab_CD4+/unstim                  | 72 | Tgd_CD27-CD38-/unstim       |
| 32 | Tab_memory_CD4+/unstim           | 73 | Tgd_CD28-CD38+/unstim       |
| 33 | Tab_memory_CD4+CCR7+/unstim      | 74 | Tgd_CD28+CD38+/unstim       |
| 34 | Tab_memory_CD4+CD28+/unstim      | 75 | Tgd_CD28+CD38-/unstim       |
| 35 | Tab_memory_CD4+CD57+/unstim      | 76 | Tgd_CD28-CD38-/unstim       |
| 36 | Tab_naive_CD4+/unstim            | 77 | Tgd_CD45RA-CD38+/unstim     |
| 37 | Tab_naive_CD4+CCR7+/unstim       | 78 | Tgd_CD45RA+CD38+/unstim     |
| 38 | Tab_naive_CD4+CD28+/unstim       | 79 | Tgd_CD45RA+CD38-/unstim     |
| 39 | Tab_naive_CD4+CD57+/unstim       | 80 | Tgd_CD45RA-CD38-/unstim     |
| 40 | Tab_CD4+CD45RO-CD28+/unstim      | 81 | Tgd_CD16-CD38-/unstim       |
| 41 | Tab_CD4+CD45RO+CD28+/unstim      | 82 | Tgd_CD16-CD38+/unstim       |

|     |                                    |     |                                |
|-----|------------------------------------|-----|--------------------------------|
| 83  | Tgd_CD16+CD38-/unstim              | 126 | NK_IFNg+/PMA_Iono              |
| 84  | Tgd_CD16+CD38+/unstim              | 127 | NK_IL4+/PMA_Iono               |
| 85  | Tgd_CD38-HLA-DR-/unstim            | 128 | NK_TNF+/PMA_Iono               |
| 86  | Tgd_CD38+CD11c-/unstim             | 129 | NK_56+16-/PMA_Iono             |
| 87  | Tgd_CD38+CD11c+/unstim             | 130 | monocytes/PMA_Iono             |
| 88  | Tgd_CD38+CD11c+HLA-DR+/unstim      | 131 | monocytes_CD16-CD14+/PMA_Iono  |
| 89  | Tgd_CD38+HLA-DR-/unstim            | 132 | monocytes_16-14+TNFa+/PMA_Iono |
| 90  | Tgd_CD38+HLA-DR+/unstim            | 133 | monocytes_CD16+CD14-/PMA_Iono  |
| 91  | Tgd_CD38-CD11c-/unstim             | 134 | myeloid_DC/PMA_Iono            |
| 92  | Tgd_CD38-CD11c+/unstim             | 135 | mDCs/PMA_Iono                  |
| 93  | Tgd_CD38-HLA-DR+/unstim            | 136 | mDC_TNFa+/PMA_Iono             |
| 94  | Tgd_CD57-CD38-/unstim              | 137 | pDC/PMA_Iono                   |
| 95  | Tgd_CD57-CD38+/unstim              | 138 | pDC_TNFa+/PMA_Iono             |
| 96  | Tgd_CD57+CD38-/unstim              | 139 | Tab_percent/PMA_Iono           |
| 97  | Tgd_CD57+CD38+/unstim              | 140 | Tab_CD4+/PMA_Iono              |
| 98  | B/PMA_Iono                         | 141 | Tab_CD4+CD8+/PMA_Iono          |
| 99  | B_CD20+CD38+/PMA_Iono              | 142 | Tab_CD8-IFNg+/PMA_Iono         |
| 100 | B_CD20+CD27+/PMA_Iono              | 143 | Tab_CD8-IL4+/PMA_Iono          |
| 101 | B_CD20+IFNg+/PMA_Iono              | 144 | Tab_CD8-IL17+/PMA_Iono         |
| 102 | B_CD20+IL4+/PMA_Iono               | 145 | Tab_CD8-TNFa+/PMA_Iono         |
| 103 | B_CD20+TNFa+/PMA_Iono              | 146 | Tab_CD8+/PMA_Iono              |
| 104 | B_CD38+IgD+/PMA_Iono               | 147 | Tab_CD8+IFNg+/PMA_Iono         |
| 105 | B_CD38-IgD+/PMA_Iono               | 148 | Tab_CD8+IL4+/PMA_Iono          |
| 106 | B_CD20+IgM+/PMA_Iono               | 149 | Tab_CD8+IL17+/PMA_Iono         |
| 107 | B_memory/PMA_Iono                  | 150 | Tab_CD8+TNFa+/PMA_Iono         |
| 108 | B_memory_CD20+CD27+/PMA_Iono       | 151 | Tgd_percent/PMA_Iono           |
| 109 | B_memory_TNFa+/PMA_Iono            | 152 | Tgd_CD38-IFNg+/PMA_Iono        |
| 110 | B_memory_CD20+CD10+/PMA_Iono       | 153 | Tgd_CD38-IL4+/PMA_Iono         |
| 111 | B_memory_CD20+CD5+/PMA_Iono        | 154 | Tgd_CD38-IL17A+/PMA_Iono       |
| 112 | B_naive/PMA_Iono                   | 155 | Tgd_CD38-TNFa+/PMA_Iono        |
| 113 | B_naive_CD20+CD27+/PMA_Iono        | 156 | Tgd_CD38+IFNg+/PMA_Iono        |
| 114 | B_naive_TNFa+/PMA_Iono             | 157 | Tgd_CD38+IL17A+/PMA_Iono       |
| 115 | B_naive_CD20+CD10+/PMA_Iono        | 158 | Tgd_CD38+TNFa+/PMA_Iono        |
| 116 | B_naive_CD20+CD5+/PMA_Iono         | 159 | B/R848                         |
| 117 | B_transitional/PMA_Iono            | 160 | B_CD20+CD38+/R848              |
| 118 | B_transitional_CD20+CD27+/PMA_Iono | 161 | B_CD20+CD27+/R848              |
| 119 | B_transitional_TNFa+/PMA_Iono      | 162 | B_CD20+IFNg+/R848              |
| 120 | B_transitional_CD20+CD5+/PMA_Iono  | 163 | B_CD20+IL4+/R848               |
| 121 | B_transitional_CD20+CD10+/PMA_Iono | 164 | B_CD20+TNFa+/R848              |
| 122 | plasmablast/PMA_Iono               | 165 | B_CD38+IgD+/R848               |
| 123 | NK/PMA_Iono                        | 166 | B_CD38-IgD+/R848               |
| 124 | NK_CD56++CD16-/PMA_Iono            | 167 | B_CD20+IgM+/R848               |
| 125 | NK_CD56+CD16+/PMA_Iono             | 168 | B_memory/R848                  |

|     |                                |     |                                     |
|-----|--------------------------------|-----|-------------------------------------|
| 169 | B_memory_CD20+CD27+/R848       | 207 | B_CD20+IL4+/CpG_Dotap               |
| 170 | B_memory_TNFa+/R848            | 208 | B_CD20+TNFa+/CpG_Dotap              |
| 171 | B_memory_CD20+CD10+/R848       | 209 | B_CD38+IgD+/CpG_Dotap               |
| 172 | B_memory_CD20+CD5+/R848        | 210 | B_CD38-IgD+/CpG_Dotap               |
| 173 | B_naive/R848                   | 211 | B_CD20+IgM+/CpG_Dotap               |
| 174 | B_naive_CD20+CD27+/R848        | 212 | B_memory/CpG_Dotap                  |
| 175 | B_naive_TNFa+/R848             | 213 | B_memory_CD20+CD27+/CpG_Dotap       |
| 176 | B_naive_CD20+CD10+/R848        | 214 | B_memory_TNFa+/CpG_Dotap            |
| 177 | B_naive_CD20+CD5+/R848         | 215 | B_memory_CD20+CD10+/CpG_Dotap       |
| 178 | B_transitional/R848            | 216 | B_memory_CD20+CD5+/CpG_Dotap        |
| 179 | B_transitional_CD20+CD27+/R848 | 217 | B_naive/CpG_Dotap                   |
| 180 | B_transitional_TNFa+/R848      | 218 | B_naive_CD20+CD27+/CpG_Dotap        |
| 181 | B_transitional_CD20+CD5+/R848  | 219 | B_naive_TNFa+/CpG_Dotap             |
| 182 | B_transitional_CD20+CD10+/R848 | 220 | B_naive_CD20+CD10+/CpG_Dotap        |
| 183 | plasmablast/R848               | 221 | B_naive_CD20+CD5+/CpG_Dotap         |
| 184 | NK/R848                        | 222 | B_transitional/CpG_Dotap            |
| 185 | NK_CD56++CD16-/R848            | 223 | B_transitional_CD20+CD27+/CpG_Dotap |
| 186 | NK_CD56+CD16+/R848             | 224 | B_transitional_TNFa+/CpG_Dotap      |
| 187 | NK_56+16-/R848                 | 225 | B_transitional_CD20+CD5+/CpG_Dotap  |
| 188 | monocytes/R848                 | 226 | B_transitional_CD20+CD10+/CpG_Dotap |
| 189 | monocytes_CD16-CD14+/R848      | 227 | plasmablast/CpG_Dotap               |
| 190 | monocytes_16-14+TNFa+/R848     | 228 | NK/CpG_Dotap                        |
| 191 | monocytes_CD16+CD14-/R848      | 229 | NK_CD56++CD16-/CpG_Dotap            |
| 192 | myeloid_DC/R848                | 230 | NK_CD56+CD16+/CpG_Dotap             |
| 193 | mDCs/R848                      | 231 | NK_56+16-/CpG_Dotap                 |
| 194 | mDC_IL4+/R848                  | 232 | monocytes/CpG_Dotap                 |
| 195 | mDC_TNFa+/R848                 | 233 | monocytes_CD16-CD14+/CpG_Dotap      |
| 196 | pDC/R848                       | 234 | monocytes_CD16+CD14-/CpG_Dotap      |
| 197 | pDC_IFNa+/R848                 | 235 | myeloid_DC/CpG_Dotap                |
| 198 | pDC_TNFa+/R848                 | 236 | mDCs/CpG_Dotap                      |
| 199 | Tab_percent/R848               | 237 | pDC/CpG_Dotap                       |
| 200 | Tab_CD4+/R848                  | 238 | pDC_IFNa+/CpG_Dotap                 |
| 201 | Tab_CD4+CD8+/R848              | 239 | pDC_TNFa+/CpG_Dotap                 |
| 202 | Tab_CD8+/R848                  | 240 | Tab_percent/CpG_Dotap               |
| 203 | Tgd_percent/R848               | 241 | Tab_CD4+/CpG_Dotap                  |
| 204 | B_CD20+CD38+/CpG_Dotap         | 242 | Tab_CD4+CD8+/CpG_Dotap              |
| 205 | B_CD20+CD27+/CpG_Dotap         | 243 | Tab_CD8+/CpG_Dotap                  |
| 206 | B_CD20+IFNg+/CpG_Dotap         | 244 | Tgd_percent/CpG_Dotap               |

**Supplementary Table 5: Two-dimensional CyTOF gates**

B: CD66<sup>-</sup>CD45<sup>+</sup>CD19<sup>+</sup>; plasmablast: CD66<sup>-</sup>CD45<sup>+</sup>CD19<sup>+</sup>CD38<sup>hi</sup>CD27<sup>+</sup>; NK: CD66<sup>-</sup>CD45<sup>+</sup>CD19<sup>-</sup>CD3<sup>-</sup>TCR $\gamma/\delta$ <sup>-</sup>TCR $\alpha/\beta$ <sup>+</sup>CD45RA<sup>+</sup>CD7<sup>+</sup>; Tab: CD66<sup>-</sup>CD45<sup>+</sup>CD3<sup>+</sup>TCR $\alpha/\beta$ <sup>+</sup>; monocytes: CD66<sup>-</sup>

CD45<sup>+</sup>CD19<sup>-</sup>CD3<sup>-</sup>TCR $\gamma/\delta$ <sup>-</sup>TCR $\alpha/\beta$ <sup>-</sup>CD45RA<sup>-</sup>CD7<sup>-</sup>CD11c<sup>+</sup>HLA-DR<sup>+</sup>CD33<sup>+/-</sup>CD14<sup>+/-</sup>; myeloid\_DC:  
CD66<sup>-</sup>CD45<sup>+</sup>CD19<sup>-</sup>CD3<sup>-</sup>TCR $\gamma/\delta$ <sup>-</sup>TCR $\alpha/\beta$ <sup>-</sup>CD45RA<sup>-</sup>CD7<sup>-</sup>CD11c<sup>+</sup>HLA-DR<sup>+</sup>CD33<sup>+/-</sup>CD14<sup>-</sup>CD16<sup>-</sup>;  
mDCs: CD66<sup>-</sup>CD45<sup>+</sup>CD19<sup>-</sup>CD3<sup>-</sup>TCR $\gamma/\delta$ <sup>-</sup>TCR $\alpha/\beta$ <sup>-</sup>CD45RA<sup>-</sup>CD7<sup>-</sup>CD11c<sup>+</sup>HLA-DR<sup>+</sup>CD33<sup>+/-</sup>CD14<sup>-</sup>  
CD16<sup>-</sup>CD1c<sup>+</sup>; pDCs: CD66<sup>-</sup>CD45<sup>+</sup>CD19<sup>-</sup>CD3<sup>-</sup>TCR $\gamma/\delta$ <sup>-</sup>TCR $\alpha/\beta$ <sup>-</sup>CD45RA<sup>-</sup>CD7<sup>-</sup>CD11c<sup>+</sup>HLA-  
DR<sup>+</sup>CD123<sup>+</sup>; Tab: CD66<sup>-</sup>CD45<sup>+</sup>CD19<sup>-</sup>CD3<sup>+</sup>TCR $\gamma/\delta$ <sup>-</sup>TCR $\alpha/\beta$ <sup>+</sup>; Treg: CD66<sup>-</sup>CD45<sup>+</sup>CD19<sup>-</sup>  
CD3<sup>+</sup>TCR $\gamma/\delta$ <sup>-</sup>TCR $\alpha/\beta$ <sup>+</sup>CD4<sup>+</sup>CD25<sup>hi</sup>CD127<sup>-</sup>; Tgd: CD66<sup>-</sup>CD45<sup>+</sup>CD19<sup>-</sup>CD3<sup>+</sup>TCR $\gamma/\delta$ <sup>+</sup>. A gating  
example is shown in Supplementary Figure 1. All gates are pre-gated on DNA<sup>+</sup> maleimide-  
DOTA<sup>-</sup> live events.

**Supplementary Fig 1**

**A**

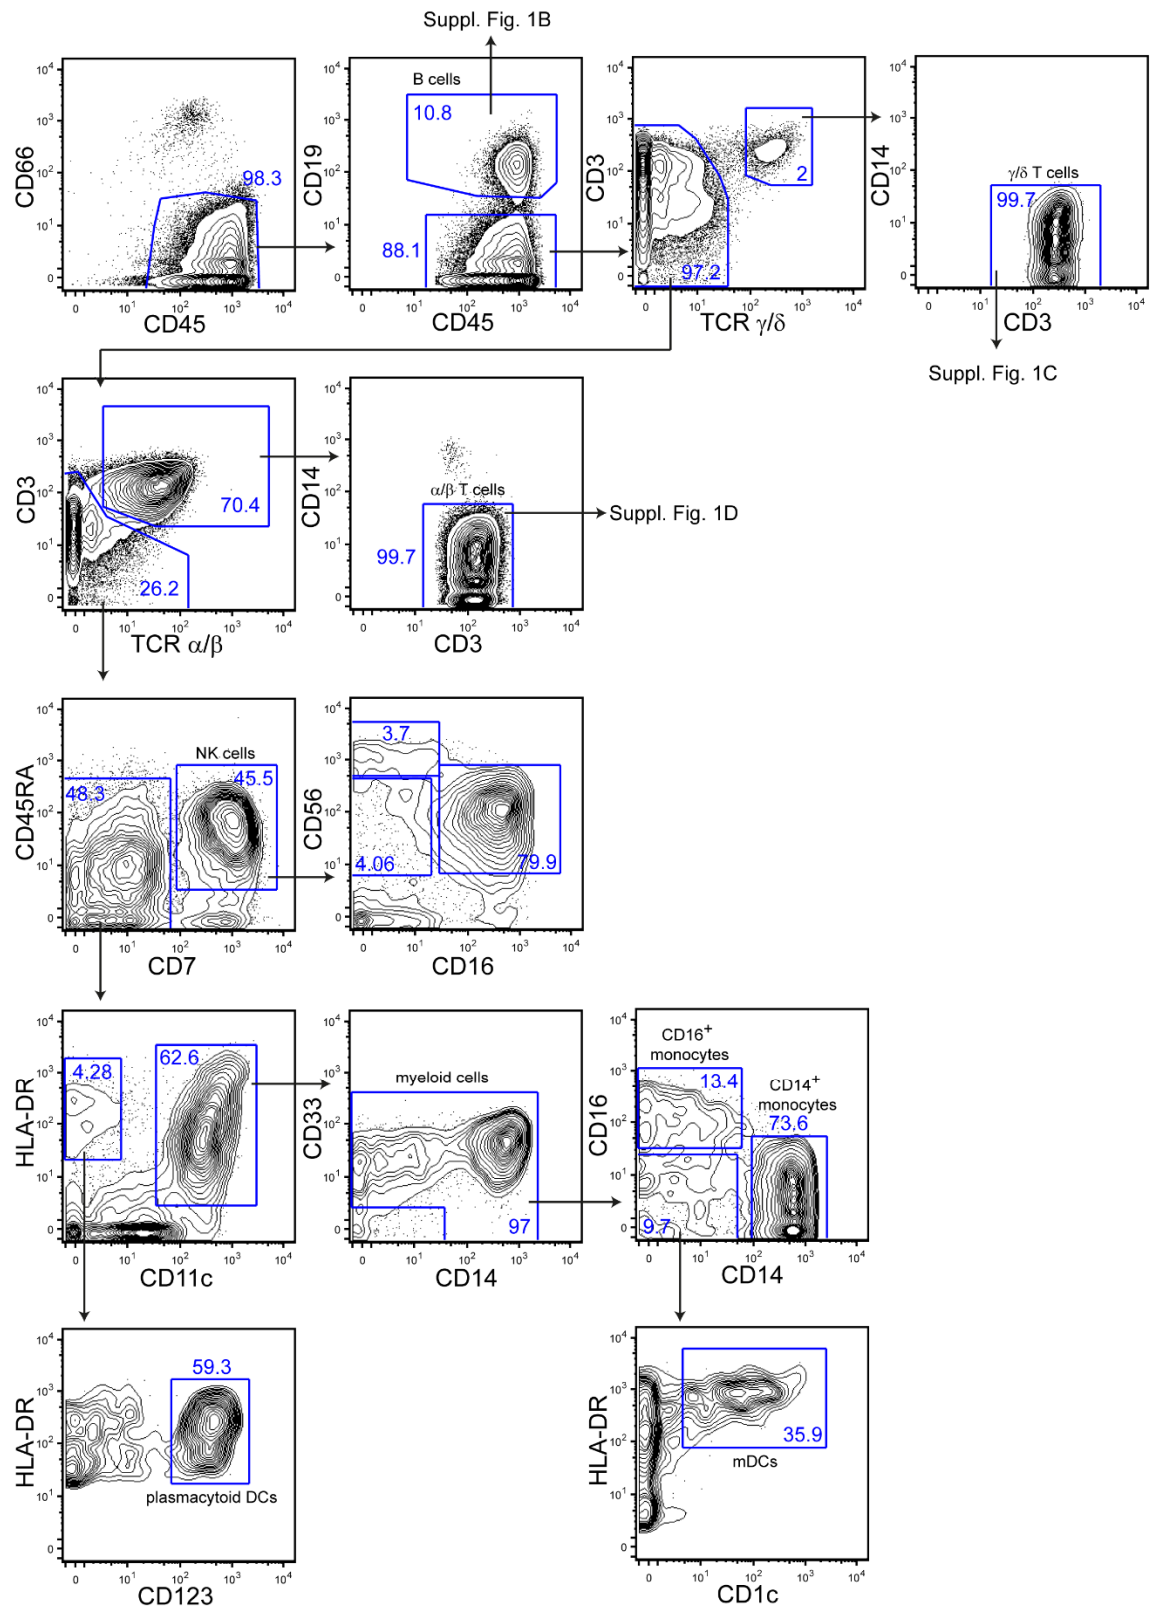



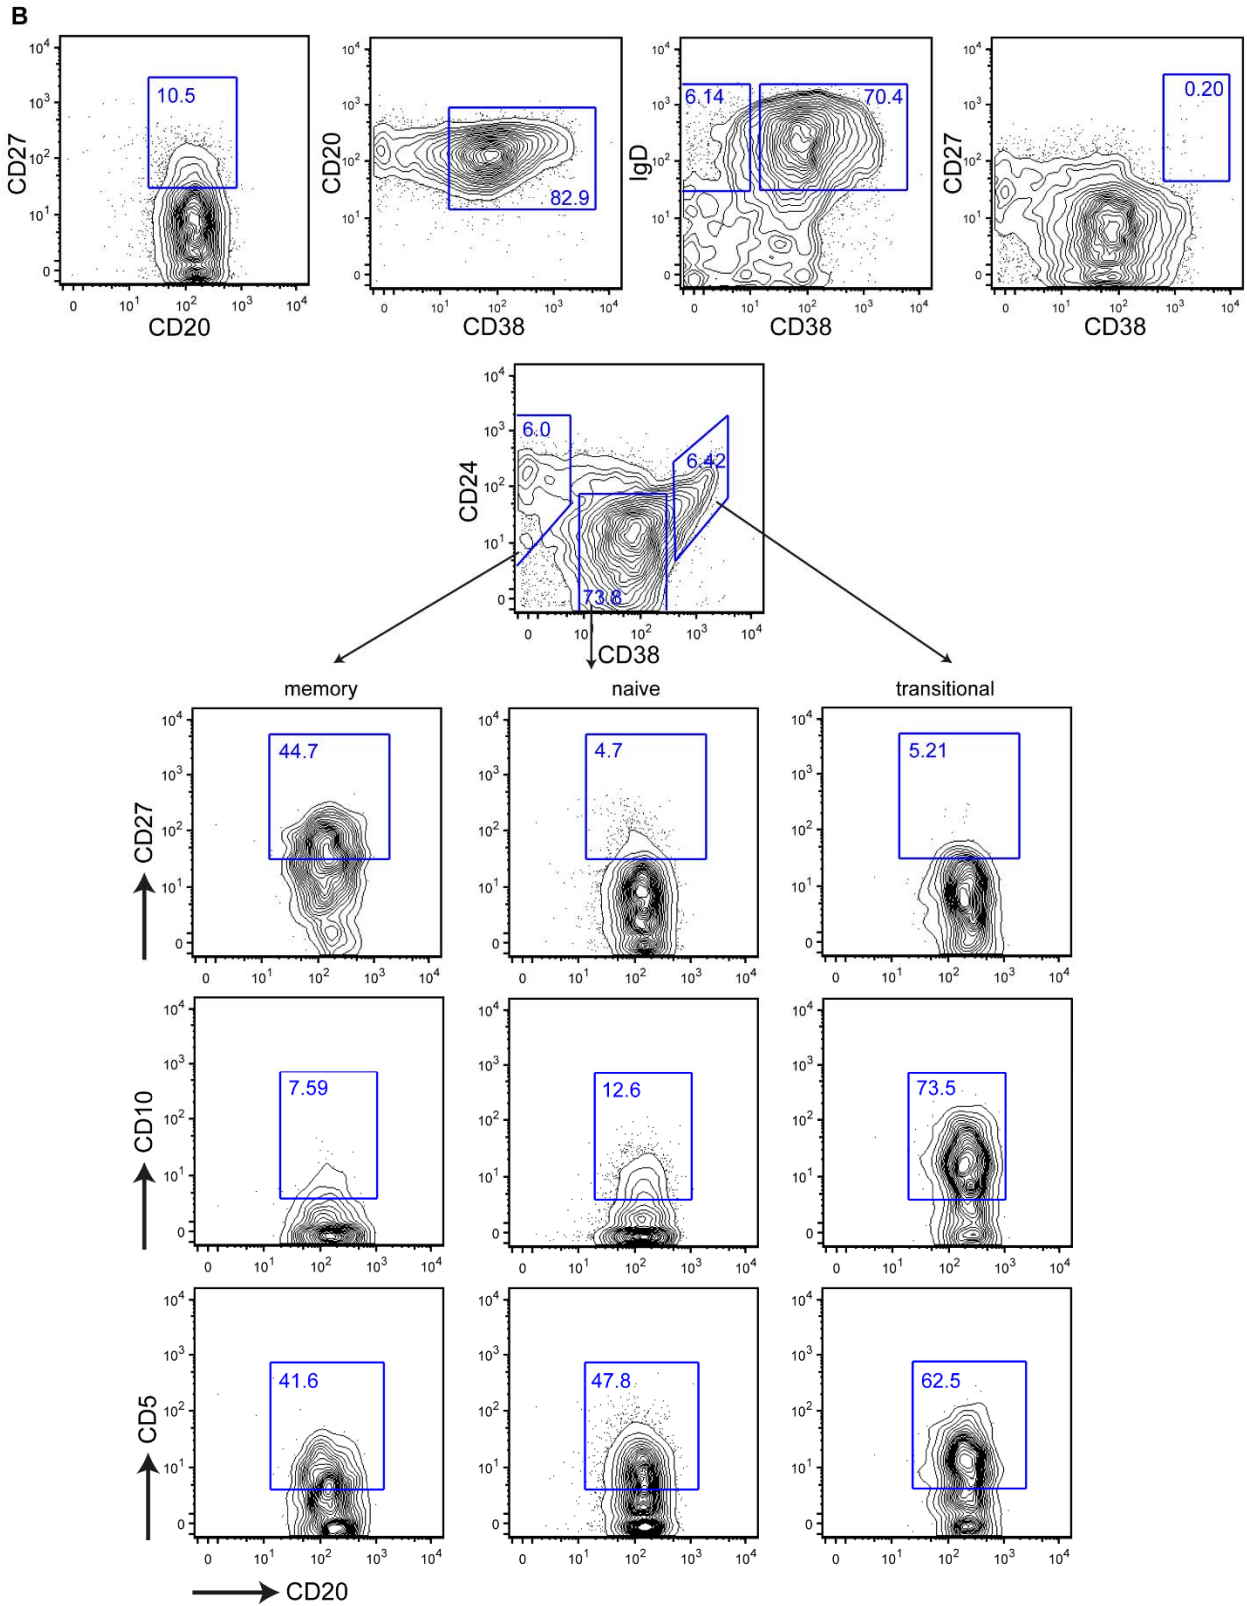

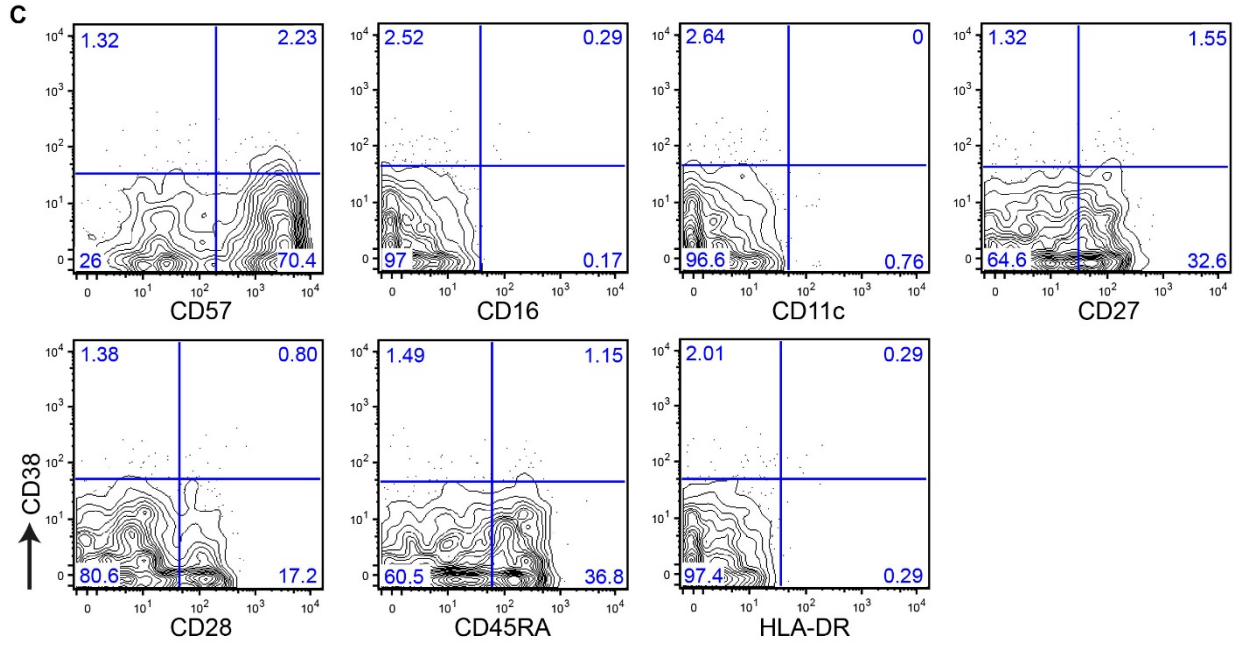

D

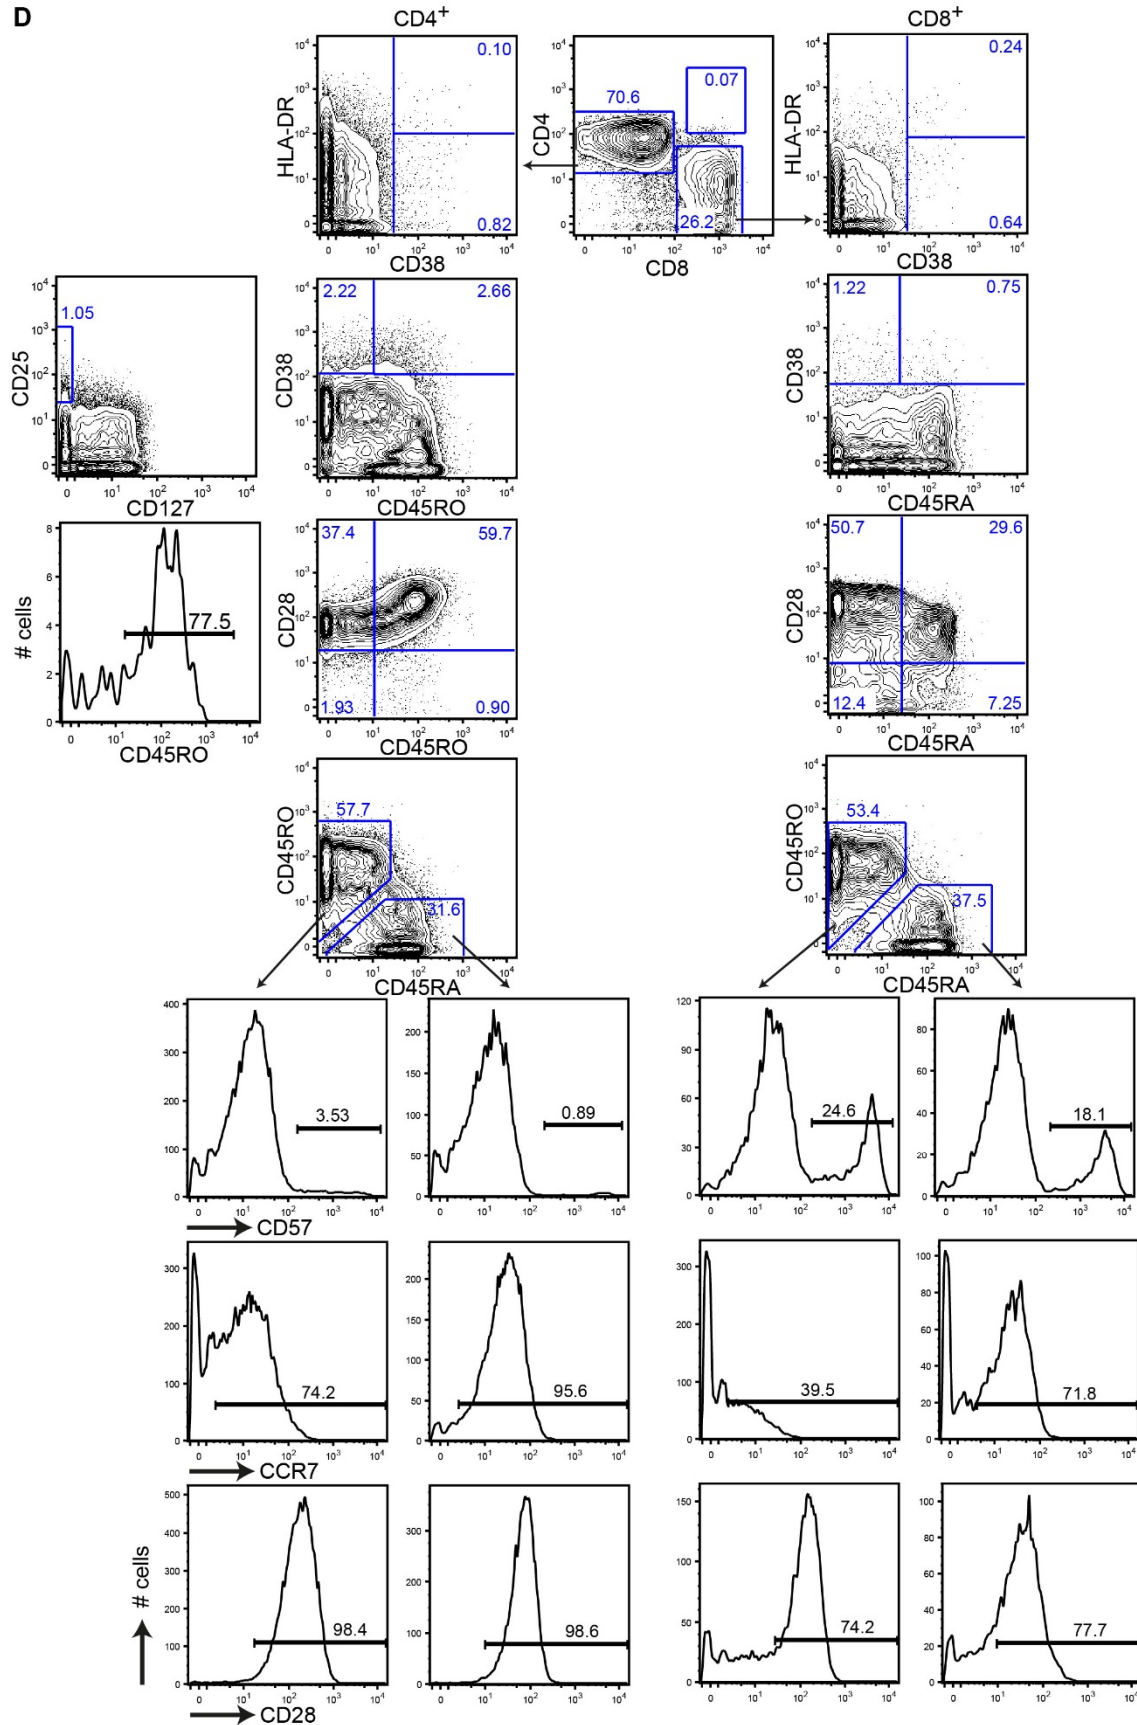

**Supplementary Figure 1: Typical two-dimensional identification of PBMC subpopulations**

All cells are pre-gated on DNA<sup>+</sup> maleimide-DOTA<sup>-</sup> live cells. (A) major PBMC subpopulations, (B) B cell gates, (C)  $\gamma/\delta$  T cell gates, and (D)  $\alpha/\beta$  T cell gates. Numbers in the gates indicate frequencies of the corresponding parent populations.

### Supplementary Figure 2

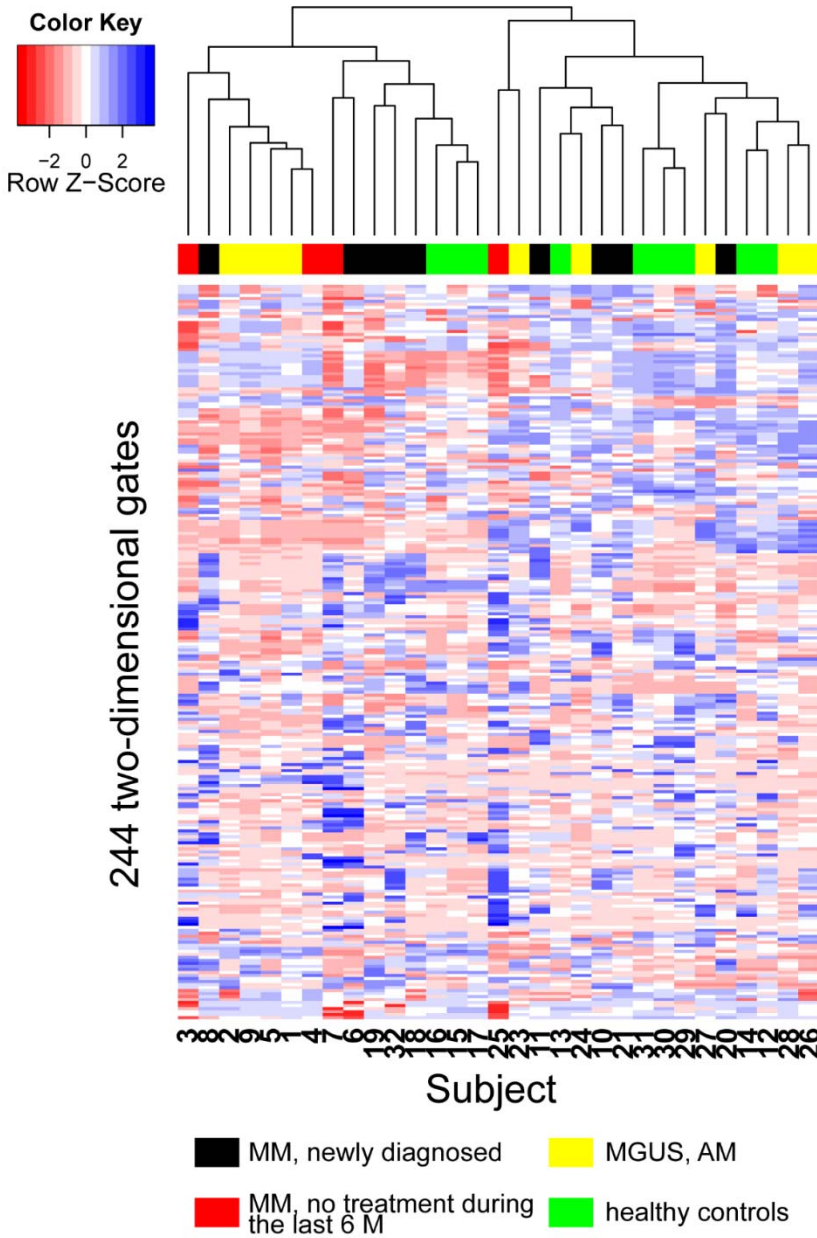

### Supplementary Figure 2: Heterogeneity of immune phenotypes in MM, AM, and MGUS patients

Normalized cell frequencies in 244 CyTOF gates are displayed in lines, samples in columns. Columns were clustered by Euclidian distances between samples based on gated cell frequencies. The subject numbers here correspond to those in Table 1.

### Supplementary Figure 3

A

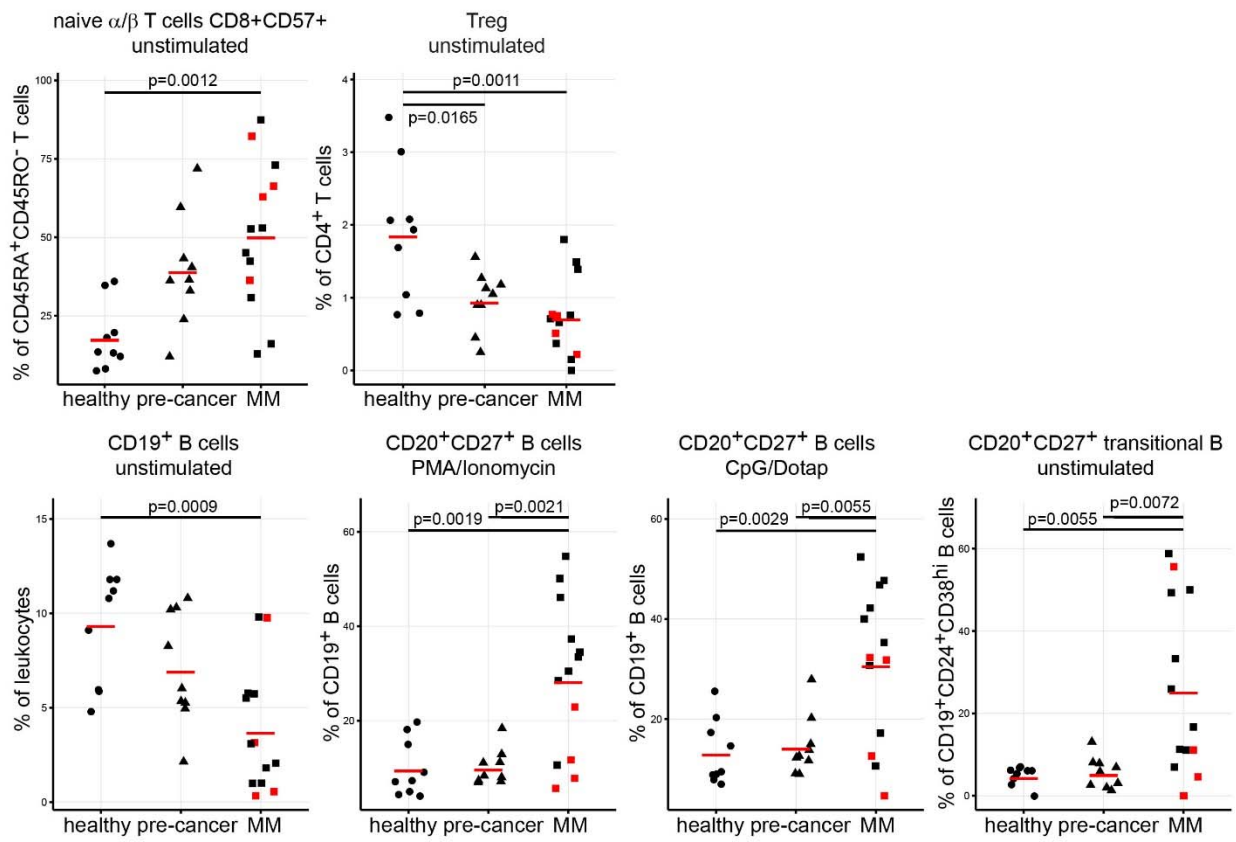

### Supplementary Figure 3 continued

## B

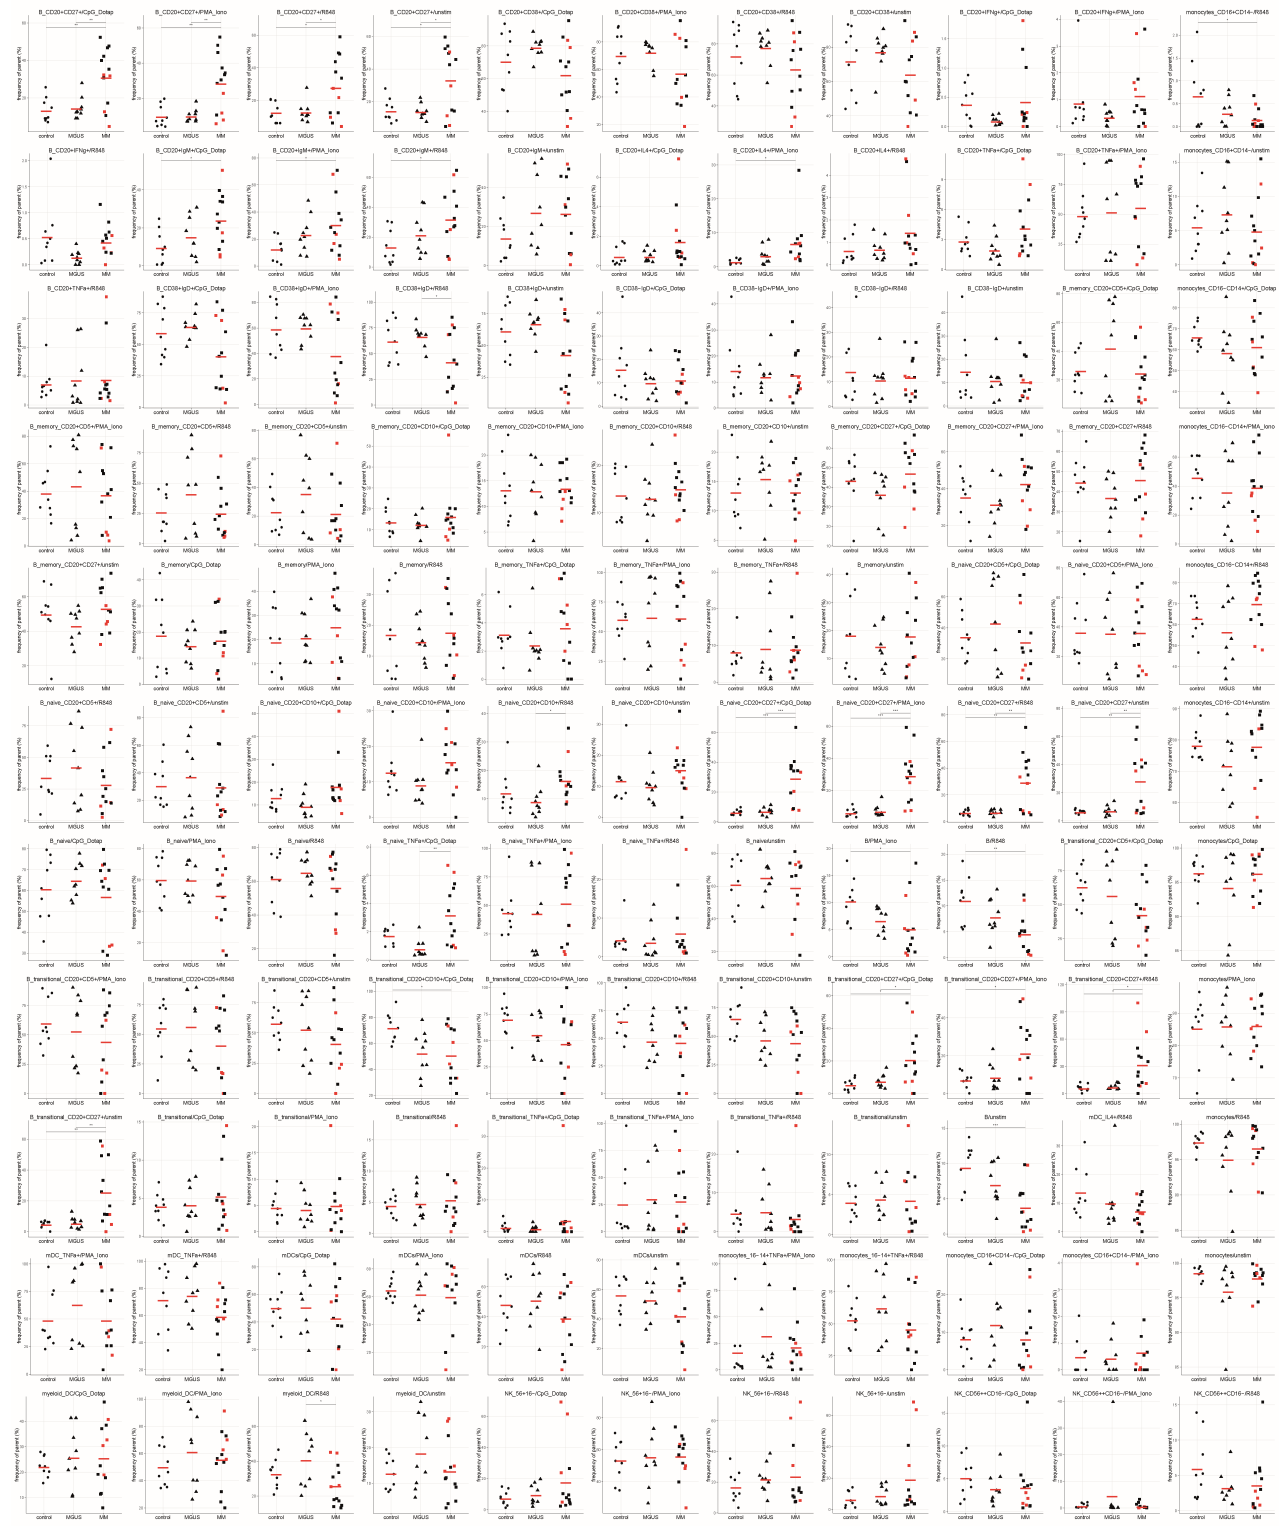





**Supplementary Figure 3: Cell frequency differences between MM, MGUS/AM, and healthy control PBMC populations**

Plotted are cell frequencies in the particular gates as frequencies of their corresponding parent populations determined with CyTOF. Red squares indicate samples from patients that received MM-specific treatment in the past but not during the last six months. Red lines indicate mean frequencies. (A) Shows scatter plots for the significant frequency differences mentioned in the results and discussion sections. (B) Illustrates population frequency differences for all 244 manual gates analyzed. Control: healthy individuals; \*  $p < 0.05$ , \*\*  $p < 0.01$ . ANOVA and TukeyHSD were used to calculate statistics.

### Supplementary Figure 4

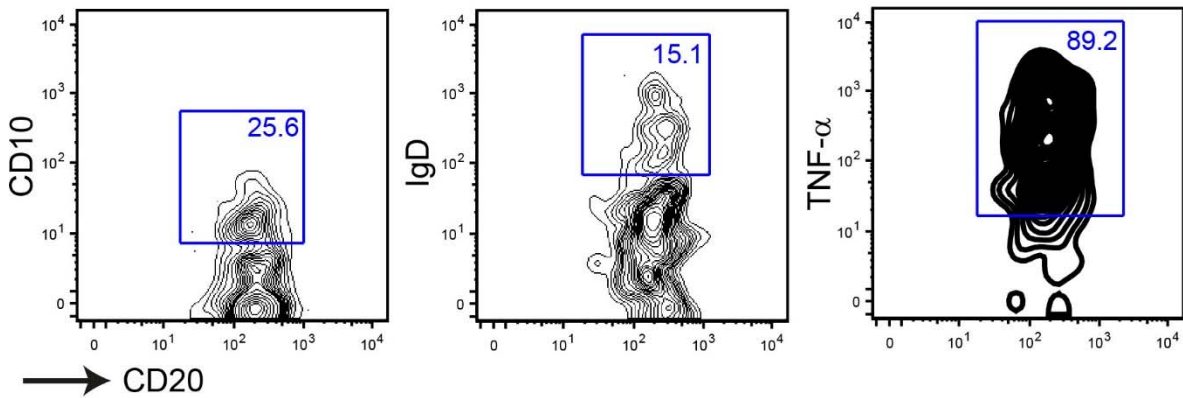

### Supplementary figure 4: Phenotypic characterization of CD24<sup>lo</sup>CD38<sup>+</sup>CD27<sup>+</sup> B cells in MM samples

All CyTOF plots are pre-gated on CD19<sup>+</sup>CD20<sup>+</sup>CD24<sup>lo</sup>CD38<sup>+</sup>CD27<sup>+</sup> B cells. Shown is one example out of n=13 patients.

### Supplementary Figure 5

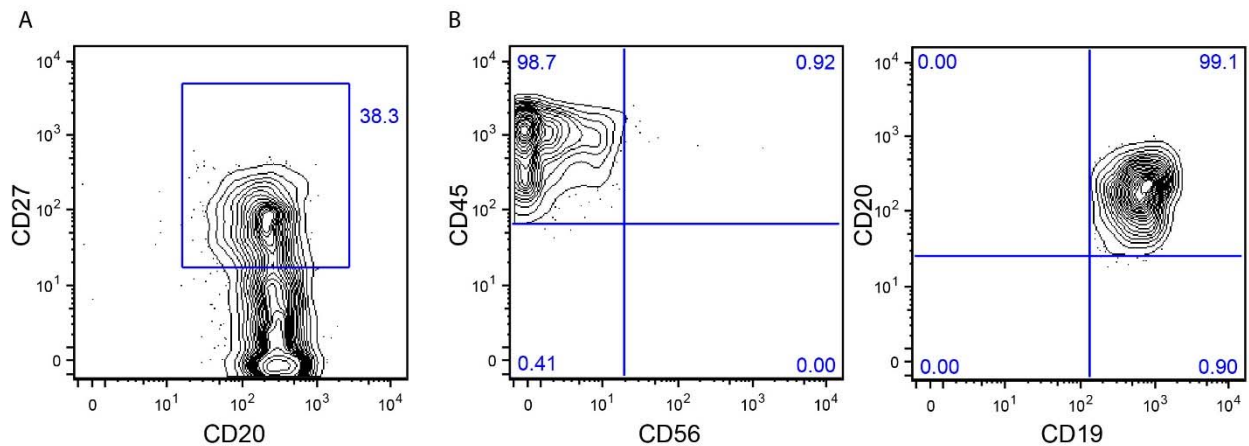

### Supplementary Figure 5: CD24<sup>lo</sup>CD38<sup>+</sup>CD27<sup>+</sup> B cells do not show characteristics of malignant plasma cell differentiation

CD24<sup>lo</sup>CD38<sup>+</sup>CD27<sup>+</sup> B cells express CD45, do not express CD56 and are CD20<sup>+</sup> as determined by CyTOF. (A) is pre-gated on CD19<sup>+</sup>CD24<sup>lo</sup>CD38<sup>+</sup> B cells. (B) shows cells included in the CD27<sup>+</sup> gate in (A). Shown is one example out of n=13 patients.

Supplementary Figure 6

A

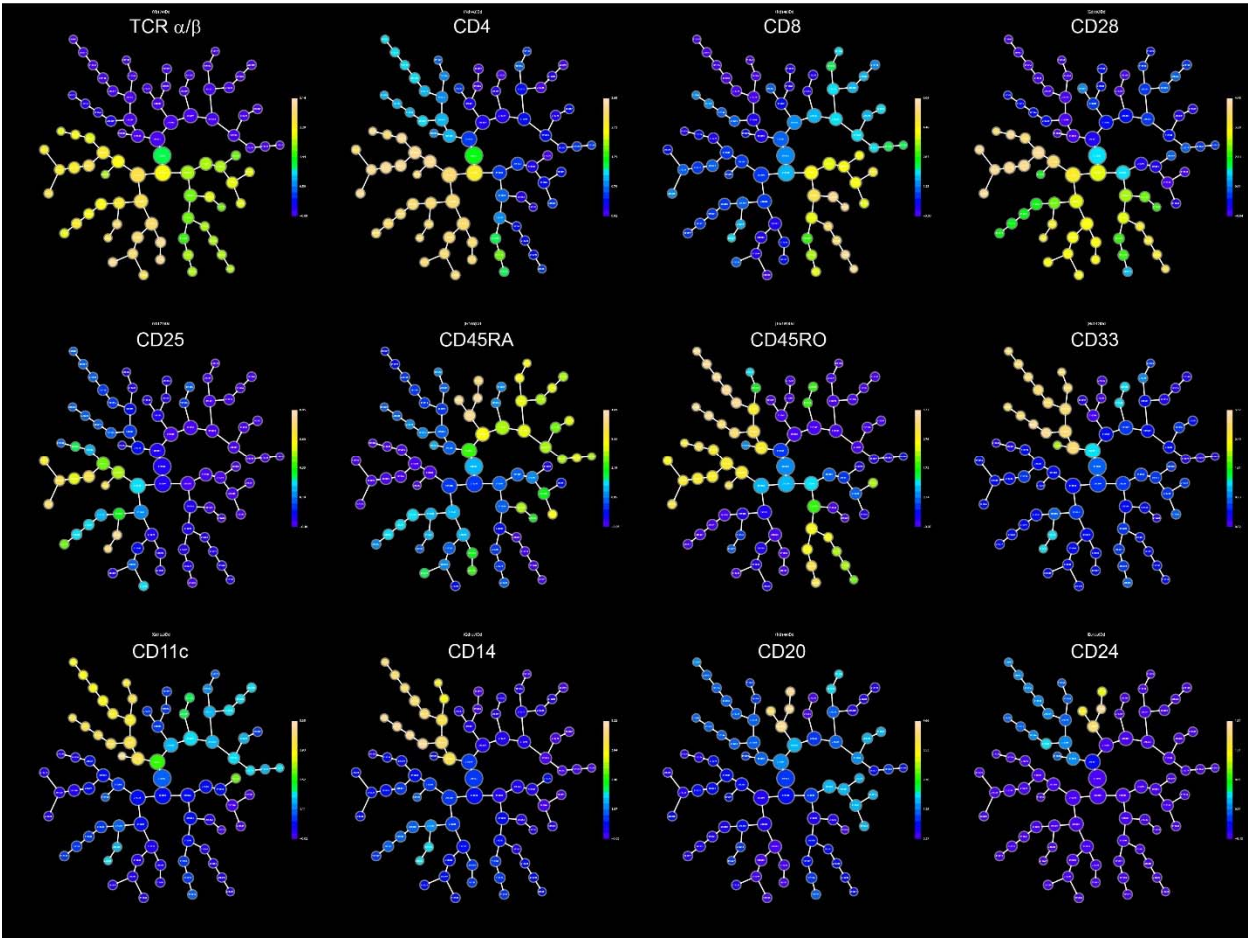

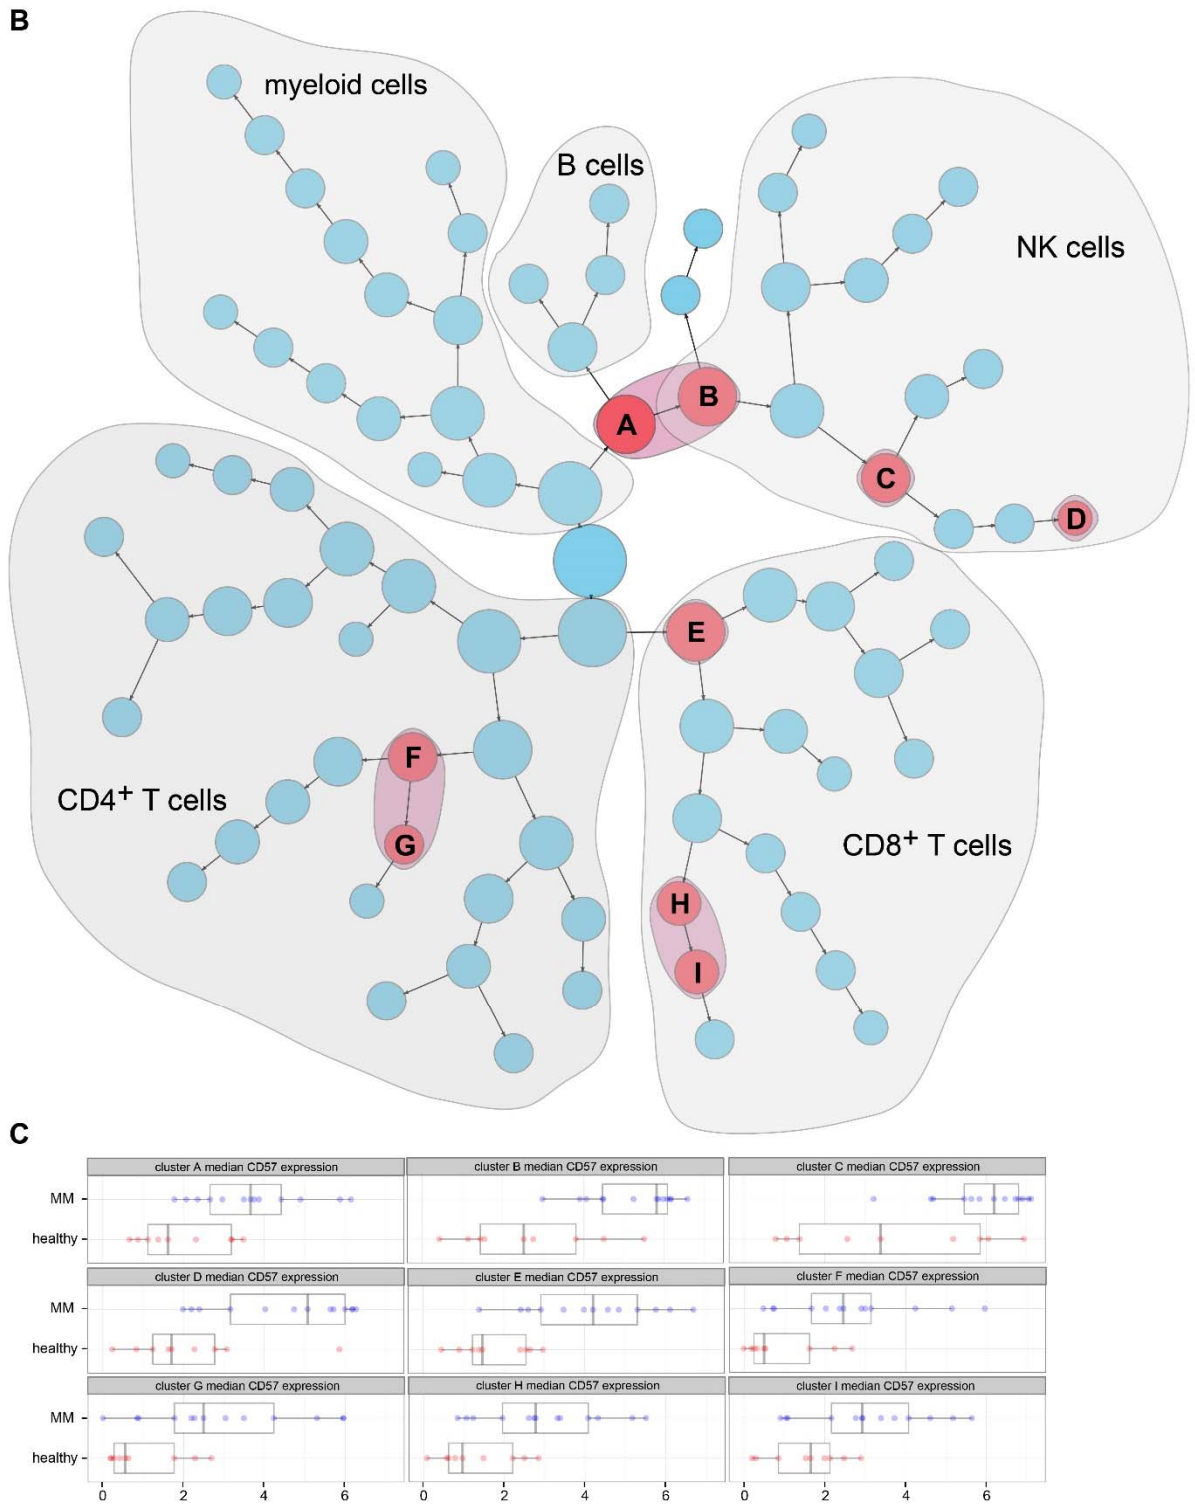

**Supplementary Figure 6: Citrus analysis for the comparison of PBMC clusters of MM patients and healthy controls**

Citrus was run on CyTOF data from all 13 multiple myeloma and 9 healthy control samples. (A) Marker plots for clustering markers. The expression levels of the markers indicated at the top of

each plot are color coded for each individual cluster leading to the identification of major known PBMC populations. (B) Clusters with significantly different ( $FDR < 0.01$ ) CD57 expression between MM patients and healthy individuals are highlighted in red and assigned individual letters. (C) Normalized expression of CD57 on cells in the indicated clusters.

**Supplementary Figure 7**

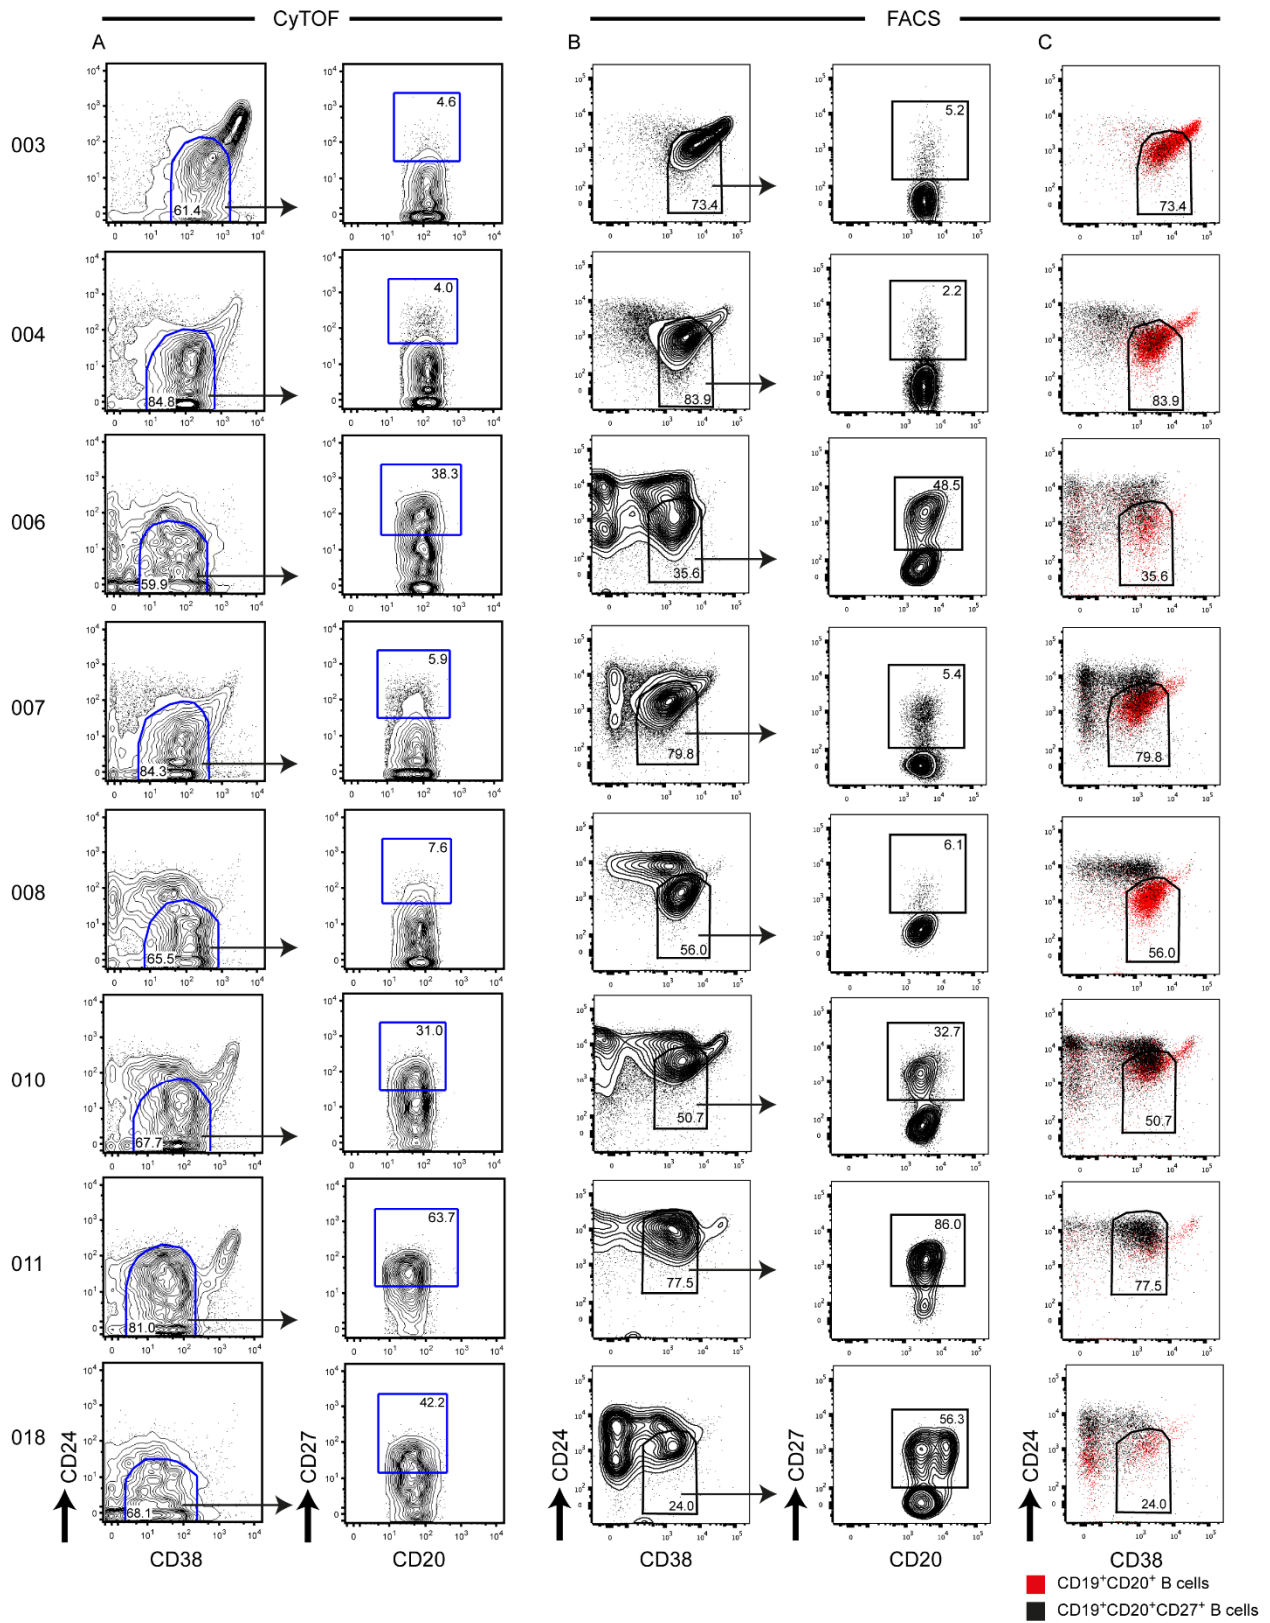

**Supplementary Figure 7 continued**

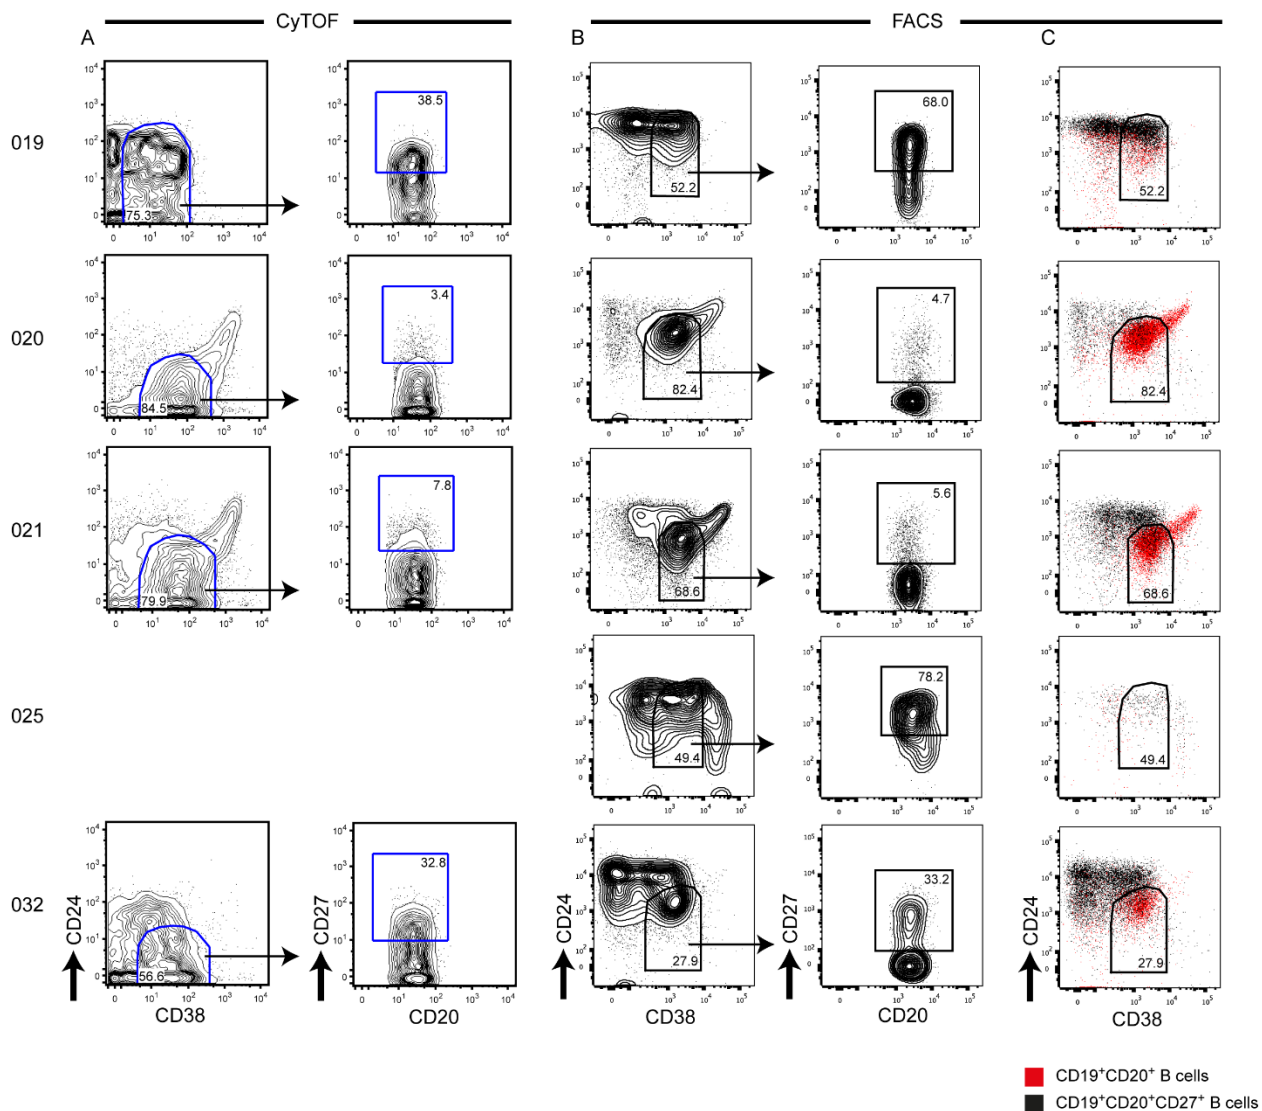

**Supplementary Figure 7: Mass cytometry and FACS side by side comparison of CD24<sup>lo</sup>CD38<sup>+</sup>CD27<sup>+</sup> B cell populations in MM samples**

(A) Shows mass cytometry and (B) FACS staining of cryopreserved PBMCs. For subject 25 we did not have any additional vials of frozen PBMCs available. In contrast to surface FACS staining, mass cytometry staining involves paraformaldehyde fixation and saponin-based permeabilization. All plots are pre-gated on CD19<sup>+</sup>CD20<sup>+</sup> B cells and CD27 was gated based on CD27 expression on total CD19<sup>+</sup>CD20<sup>+</sup> B cells. In some samples, especially when analyzed with FACS, CD38<sup>+</sup> B cells can be categorized into CD24<sup>hi</sup> and CD24<sup>lo</sup> populations. Whenever distinguishable, the CD24<sup>lo</sup> population was gated. To illustrate the distribution of CD27<sup>+</sup> cells among CD38<sup>+</sup>CD24<sup>hi</sup> and CD38<sup>+</sup>CD24<sup>lo</sup> populations, in (C) we overlaid total CD19<sup>+</sup>CD20<sup>+</sup> B cells (red) with total CD19<sup>+</sup>CD20<sup>+</sup>CD27<sup>+</sup> B cells (black). Remaining differences can be attributed to technological differences and low total CD19<sup>+</sup> B cell numbers (< 1%) in some of the samples. Numbers in the beginning of each line correspond to individual subjects as listed in Table 1. Numbers within the gates indicate percentages of total cells gated of the respective parent populations.

Supplementary Figure 8

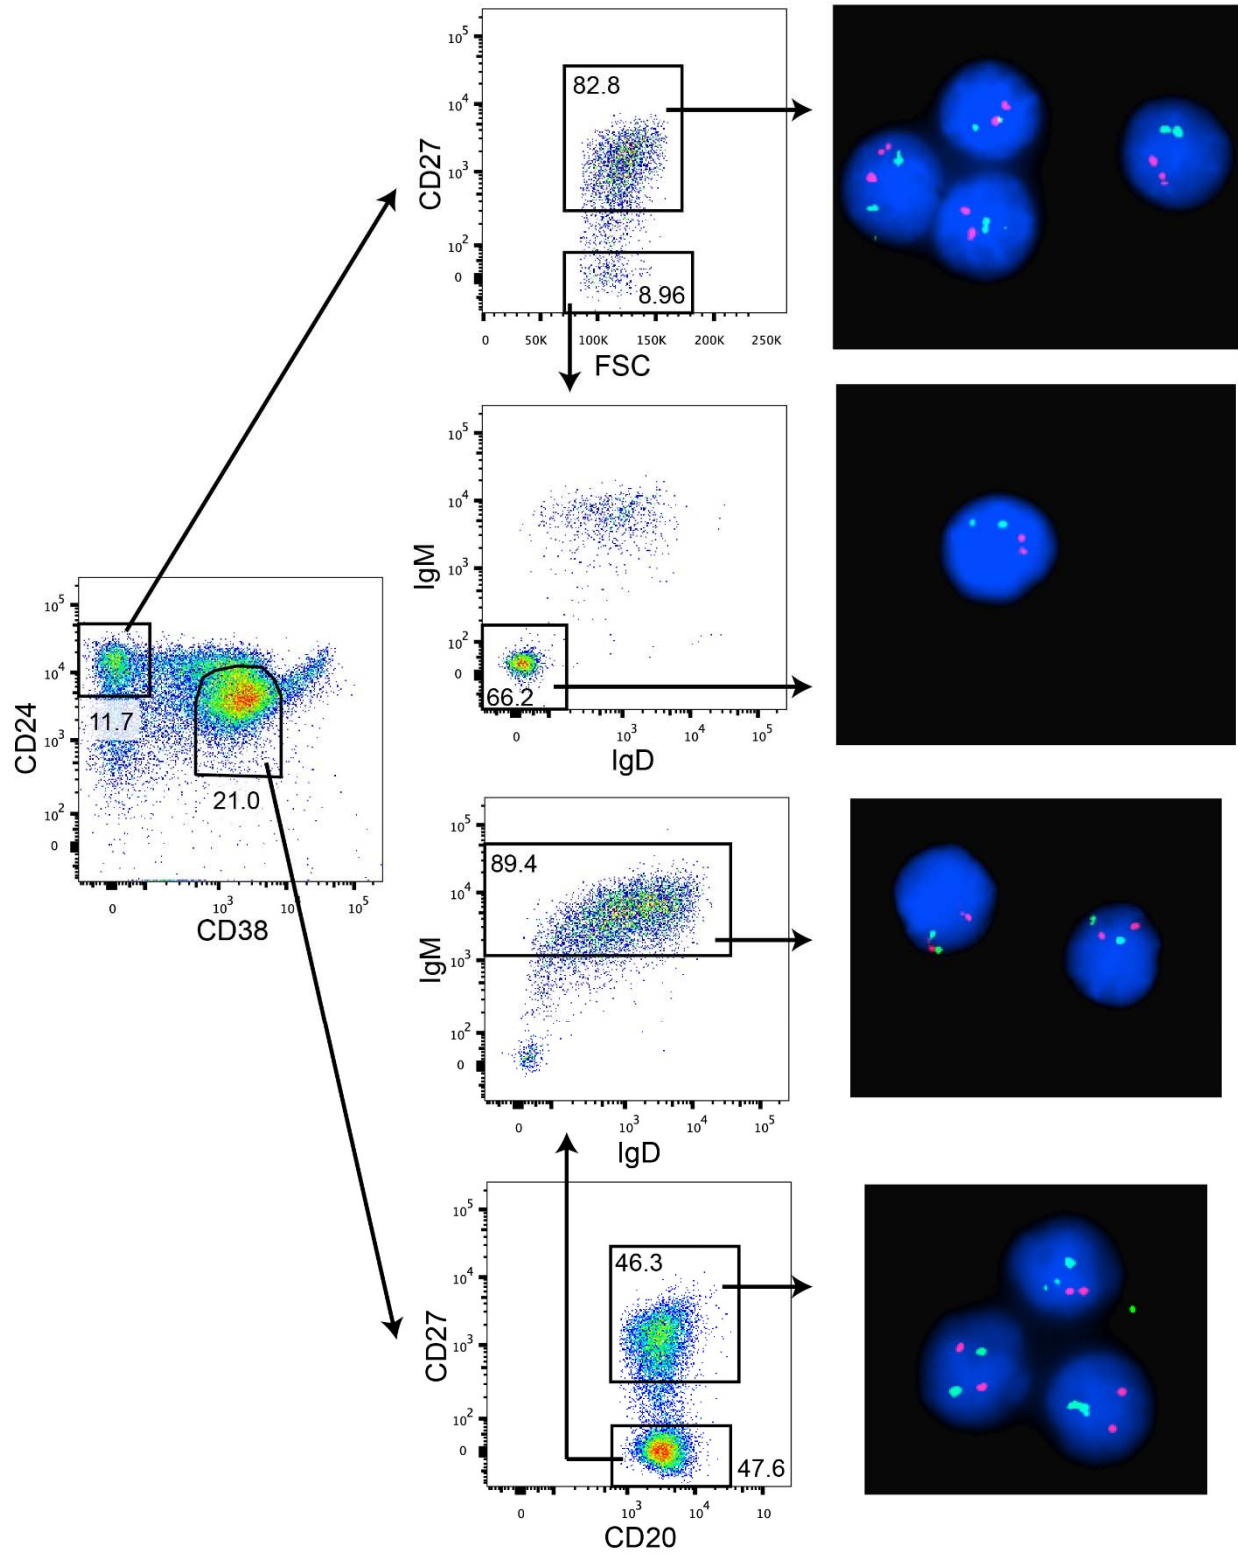



**Supplementary Figure 8: FISH analysis for t(11;14) in B cell subsets of subject 10 with a t(11;14) positive MM clone**

FACS plots are pre-gated on live CD19<sup>+</sup>CD20<sup>+</sup> B cells. FISH: orange: CCND1/MYEOV, green: IGH

## Supplementary Figure 9

A

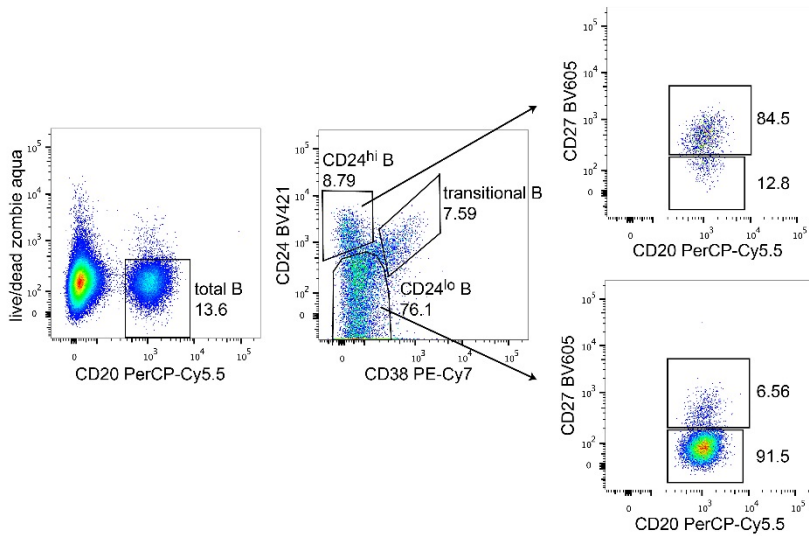

B

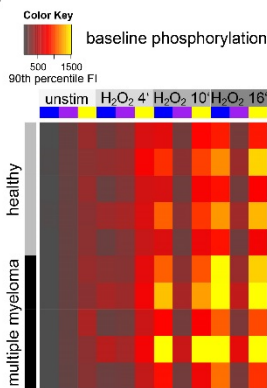

C

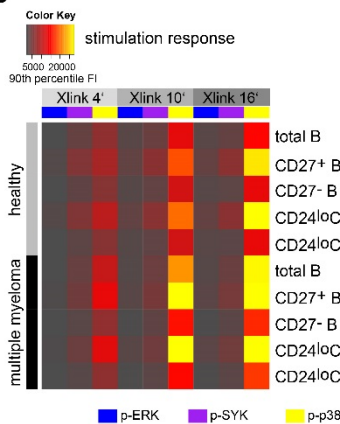

D

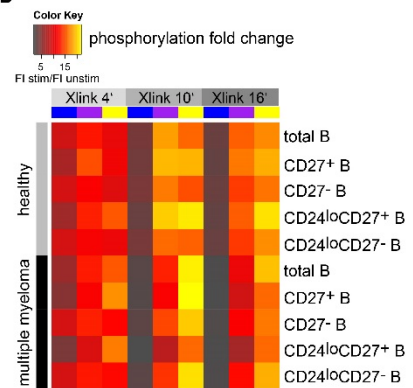

### Supplementary Figure 9: Validation of phosphorylation responses in two additional MM and healthy control samples

(A) Frequencies of CD27<sup>+</sup> B cells in CD24<sup>hi</sup>CD38<sup>-</sup> and CD24<sup>lo</sup>CD38<sup>lo</sup> B cell populations in one exemplary healthy individual. CD24<sup>hi</sup>CD38<sup>-</sup> B cells represent CD24<sup>hi</sup>CD38<sup>-</sup>CD27<sup>+</sup> memory B cells and CD24<sup>lo</sup>CD38<sup>lo</sup> B cells represent CD24<sup>lo</sup>CD38<sup>+</sup>CD27<sup>-</sup> naïve B cells as indicated by CD27 expression. (B-D)) Heatmap visualizations of mean phosphorylation levels of n=2 MM patients and n=2 age- and sex-matched healthy individuals (B) at baseline, (C) after BCR stimulation, (D) as calculated respective fold changes (stimulation/baseline levels).

**Supplementary Figure 10**

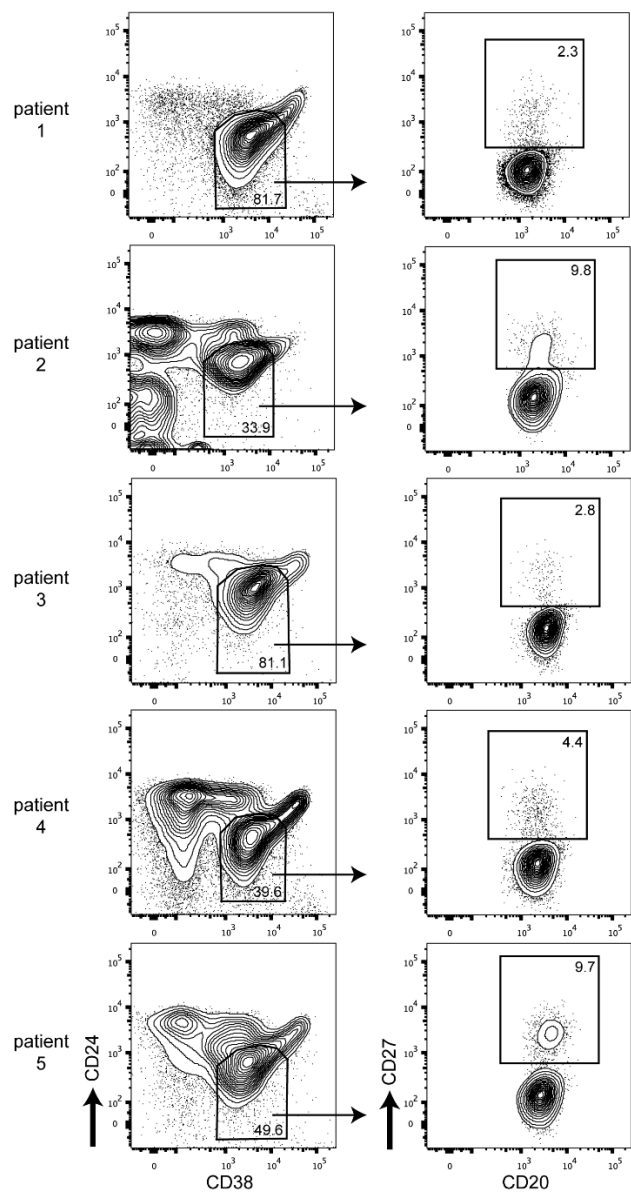

**Supplementary Figure 10: CD24<sup>lo</sup>CD38<sup>+</sup>CD27<sup>+</sup> B cells in the peripheral blood of colorectal cancer patients**

Cryopreserved PBMC of five colorectal cancer patients were analyzed with FACS. All plots are pre-gated on live CD19<sup>+</sup>CD20<sup>+</sup> lymphocytes. Patient 1: 70 year old, female, rectal adenocarcinoma, pT3pN1, treatment naïve; Patient 2: 78 year old, female, transverse colon adenocarcinoma, T3pN0, treatment naïve; Patient 3: 78 year old, male, rectal adenocarcinoma, pT3N0, treatment naïve; Patient 4: 51 year old, female, rectal adenocarcinoma, T2N0, treatment naïve; Patient 5: 87 year old, female, sigmoid adenocarcinoma, pT3pN0, treatment naïve
